# Supplementary material for: Expression of turtle riboflavin-binding protein represses mitochondrial electron transport gene expression and promotes flowering in Arabidopsis
Source: PubMed Central journal article supplement (PMC4310184; doi:10.1186/s12870-014-0381-5), 2014-12-30
Supplement: 12870_2014_381_MOESM1_ESM.pdf [file 12870_2014_381_MOESM1_ESM.pdf]

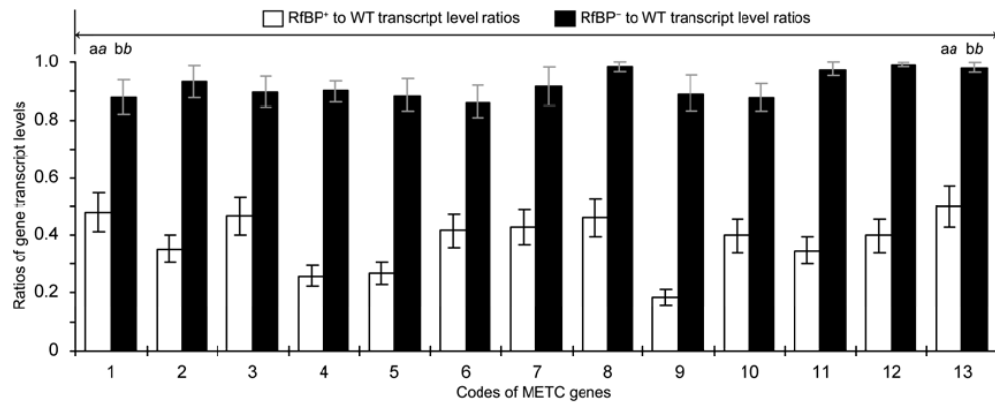

**Additional file 1: Figure S1.** Quantitative ratios of METC gene transcripts between RfBP<sup>+</sup> and WT and between RfBP<sup>-</sup> and WT plants.

Relative expression levels of the tested METC genes in contrast to the reference gene (Figure 3) were used in plant pair comparisons. Data shown are mean values  $\pm$  standard deviations from six experimental repeats each containing 15 plants. On bar graphs, different letters in regular and *italic* fonts indicate significant differences by analysis of variance using Fisher's least significant difference test and Tukey-Kramer's test, respectively ( $n = 6$ ;  $P < 0.01$ ).
