# Supplementary material for: Expression of turtle riboflavin-binding protein represses mitochondrial electron transport gene expression and promotes flowering in Arabidopsis
Source: PubMed Central journal article supplement (PMC4310184; doi:10.1186/s12870-014-0381-5), 2014-12-30
Supplement: 12870_2014_381_MOESM2_ESM.pdf [file 12870_2014_381_MOESM2_ESM.pdf]

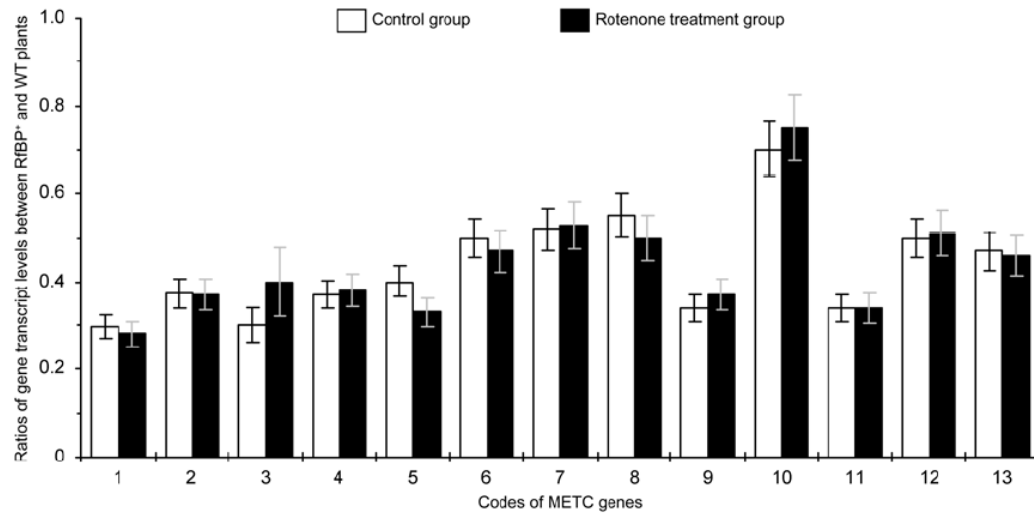

**Additional file 2: Figure S2.** The effect of rotenone on METC gene expression. Ten-day-old plants were treated with treated with 0.1% ethanol (control group) or an aqueous solution containing 40  $\mu$ M rotenone (rotenone treatment group). Two days later, gene expression in leaves was analyzed by real-time RT-PCR using *EF1 $\alpha$*  as a reference gene (Figure 6). Relative expression levels of METC genes were used in pair comparisons between RfBP<sup>+</sup> and WT plants. Data shown are mean values  $\pm$  standard deviations from six experimental repeats each containing 15 plants.
