# Supplementary material for: Expression of turtle riboflavin-binding protein represses mitochondrial electron transport gene expression and promotes flowering in Arabidopsis
Source: PubMed Central journal article supplement (PMC4310184; doi:10.1186/s12870-014-0381-5), 2014-12-30
Supplement: 12870_2014_381_MOESM3_ESM.pdf [file 12870_2014_381_MOESM3_ESM.pdf]

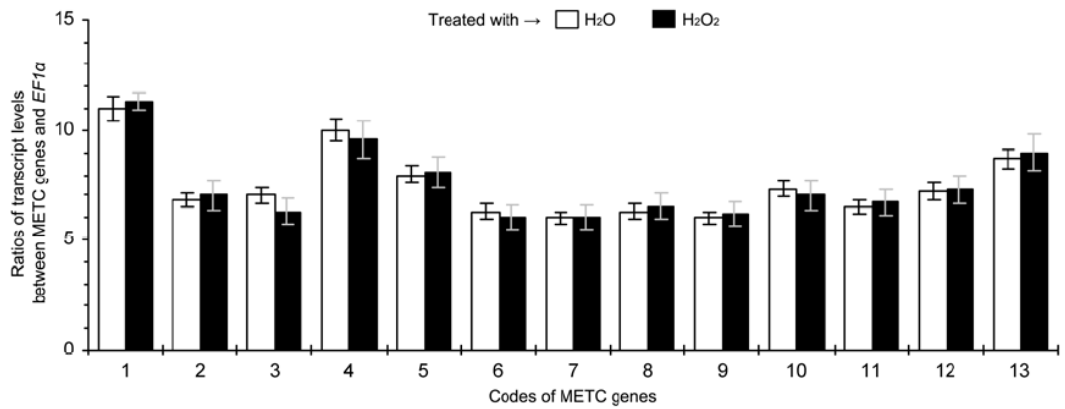

**Additional file 4: Figure S4.** Relative levels of METC gene expression in H<sub>2</sub>O<sub>2</sub>-treated and control plants.

Water or a 4  $\mu$ M aqueous solution of H<sub>2</sub>O<sub>2</sub> was used to immerse seeds and treat 7-day-old plants. Gene expression in leaves of 9-day-old plants was analyzed. Data shown are average values  $\pm$  standard deviations of results from three experimental repeats each containing 15 plants.
