# Supplementary material for: Expression of turtle riboflavin-binding protein represses mitochondrial electron transport gene expression and promotes flowering in Arabidopsis
Source: PubMed Central journal article supplement (PMC4310184; doi:10.1186/s12870-014-0381-5), 2014-12-30
Supplement: 12870_2014_381_MOESM4_ESM.pdf [file 12870_2014_381_MOESM4_ESM.pdf]

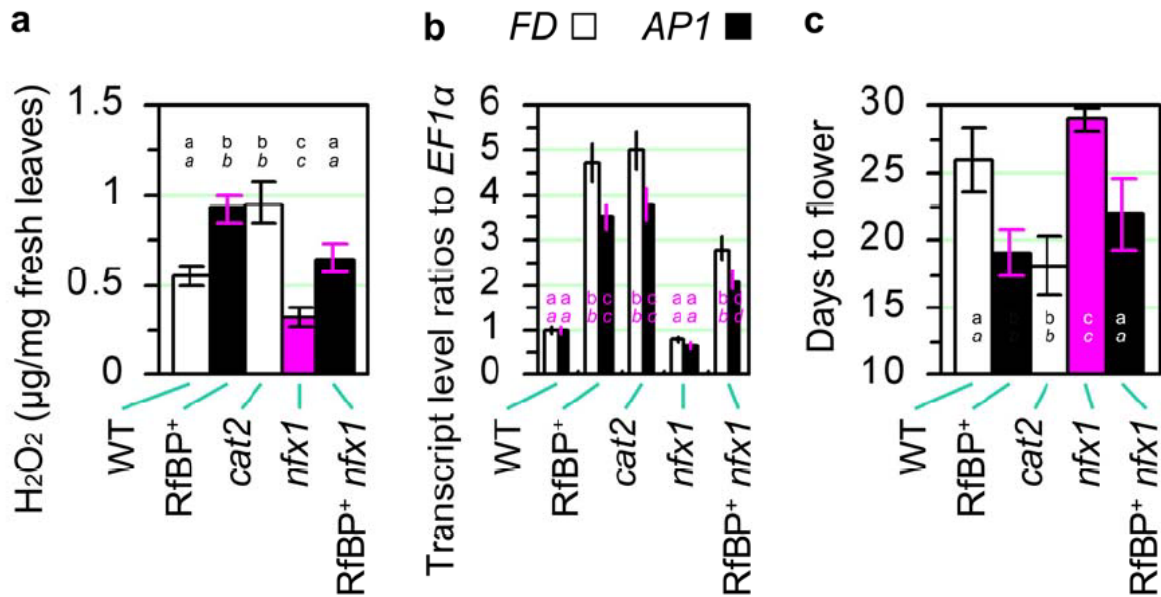

**Additional file 5: Figure S5.** Comparisons of RfBP<sup>+</sup> and *Cat2* and *NFXL1* mutations in H<sub>2</sub>O<sub>2</sub> concentrations, *FD* and *AP1* expression, and flowering time.

Shown here are H<sub>2</sub>O<sub>2</sub> concentrations in leaves (a), *FD* and *AP1* expression at the shoot apex (b), and flowering time (c) of the different plants. H<sub>2</sub>O<sub>2</sub> concentrations and gene expression were analyzed on 12-day-old plants. Data shown are average values ± standard deviations of results from three experimental repeats each containing 15 plants (a,b) and 50 plants (c). In bar graphs, different letters in regular and *italic* fonts indicate significant differences by analysis of variance using Fisher's least significant difference test and Tukey-Kramer's test, respectively (n = 3; P < 0.01).
