# Supplementary material for: Expression of turtle riboflavin-binding protein represses mitochondrial electron transport gene expression and promotes flowering in Arabidopsis
Source: PubMed Central journal article supplement (PMC4310184; doi:10.1186/s12870-014-0381-5), 2014-12-30
Supplement: 12870_2014_381_MOESM5_ESM.pdf [file 12870_2014_381_MOESM5_ESM.pdf]

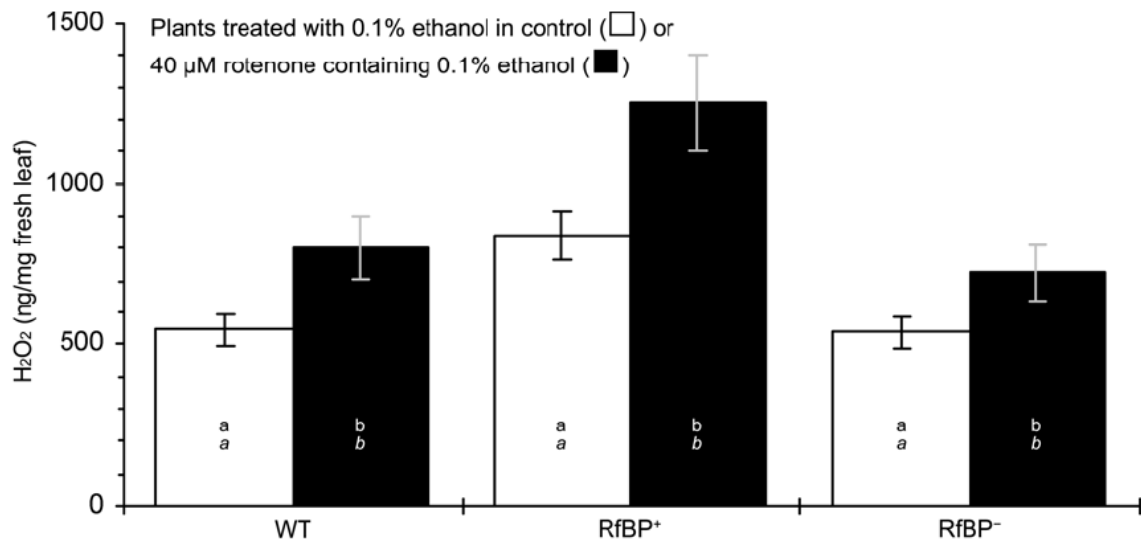

**Additional file 3: Figure S3.** The effect of rotenone on H<sub>2</sub>O<sub>2</sub> concentrations in leaves. Ten-day-old plants were treated and two days later, H<sub>2</sub>O<sub>2</sub> concentrations in leaves were measured. Data shown are average values ± standard deviations of results from three experimental repeats each containing 15 plants. In bar graphs, different letters in regular and *italic* fonts indicate significant differences by analysis of variance using Fisher's least significant difference test and Tukey-Kramer's test, respectively (n = 3; P < 0.01).
