# Supplementary material for: Expression of turtle riboflavin-binding protein represses mitochondrial electron transport gene expression and promotes flowering in Arabidopsis
Source: PubMed Central journal article supplement (PMC4310184; doi:10.1186/s12870-014-0381-5), 2014-12-30
Supplement: 12870_2014_381_MOESM6_ESM.pdf [file 12870_2014_381_MOESM6_ESM.pdf]

**Additional File 6: Table S1.** Information on genes tested and primers used in this study

| Gene (locus code)             | Locus code   | Primers / product size (bp)                                         |
|-------------------------------|--------------|---------------------------------------------------------------------|
| <i>API</i>                    | AT1G69120    | 5'-ATGCTGAAGTTGCTCTTGTTGT-3',<br>5'-AATCTTAGCCTTAAGCCTGTTA-3' / 188 |
| <i>EF1<math>\alpha</math></i> | AT1G07920    | 5'-GCTGATTGTGCTGTCCTTAT-3',<br>5'-TAGTGGCATCCATCTTGTTAC-3' / 151    |
| <i>FD</i>                     | AT4G35900    | 5'-TCCACCATTGTCCTGCTCT-3'<br>5'-TACGCTTATACCTTCTGTCTCC-3' / 220     |
| METC 1                        | At3G03070    | 5'-AAAGCCCTAATCCGATCTCAGA-3'<br>5'-GGTGTCTCCTTCACAAGCAACA-3' / 210  |
| METC 2                        | At5G67590    | 5'-ACAAGCGTGGTGAGATCGGTAA-3'<br>5'-AATCAAAGCAAGAGCAGAGTC-3' / 228   |
| METC 3                        | At2G02050    | 5'-GCACTTGGATCTAGAGATATGT-3'<br>5'-CGTTTCCTTGAGTTTATTCTG-3' / 208   |
| METC 4                        | At5G18800    | 5'-GATCCCTACTTCGGCGGTTTTA-3'<br>5'-CACCCAACATAATCATCCATCT-3' / 242  |
| METC 5                        | At2G20800    | 5'-TTTTTCCTTCACTCCTCTCT-3'<br>5'-GTCAAACCTCTGTTGTGCCCTTA-3' / 204   |
| METC 6                        | At1G15120    | 5'-ATGGCAGATGATGAAGTTGTTG-3'<br>5'-TTTAGTTTCGCAAACAGCTTTG-3' / 206  |
| METC 7                        | At3G10860    | 5'-AGCCGGTGAAATTGAAGCGGT-3'<br>5'-GTGCTCAAGCTTCTCCTGTTCC-3' / 200   |
| METC 8                        | At5G05370    | 5'-GGTGA AATTGAAGCGGTGGTT-3'<br>5'-ACCTGTGCTCCAGCTTCTCTTG-3' / 200  |
| METC 9                        | AT1G53030    | 5'-CACAAGACAGTGCCTGTTCTTT-3'<br>5'-CAAACCTTGAAACCCTCTGATC-3' / 202  |
| METC 10                       | At5G04750    | 5'-TCGGCTCGTTCTGCGATCACAA-3'<br>5'-CCAGTCTCTCCCTCTCCATT-3' / 194    |
| METC 11                       | AT2G19680    | 5'-CATCAA AATTGGTTCAACTTCA-3'<br>5'-CTTTCCTAAATGTTTCGTAGCG-3' / 210 |
| METC 12                       | At4G29480    | 5'-TGCCACTGTTGAGAAGTGCCAA-3'<br>5'-TGTGAAGGTGAATCCTCTGCCG-3' / 232  |
| METC 13                       | At1G51650    | 5'-TCGAATGCGGCGGTCCGTTCT-3'<br>5'-TCAGGTGTGTCTGACCGCAAAA-3' / 200   |
| <i>RfBP</i>                   | LOC102455463 | 5'-CGACTCCTCCTGCCTCTGCTT-3'<br>5'-ACCTCCACCCCTTCTCTTCC-3' / 171     |
